# Supplementary material
Source: Springer Nature journal article supplement (https://www.springermedizin.de/resource/supplementary/12943_2013_1167_MOESM3_ESM.pdf/9552644)

**A) *GAPDH* HR**

**B) *GAPDH* HR adjusted for tumor stage**

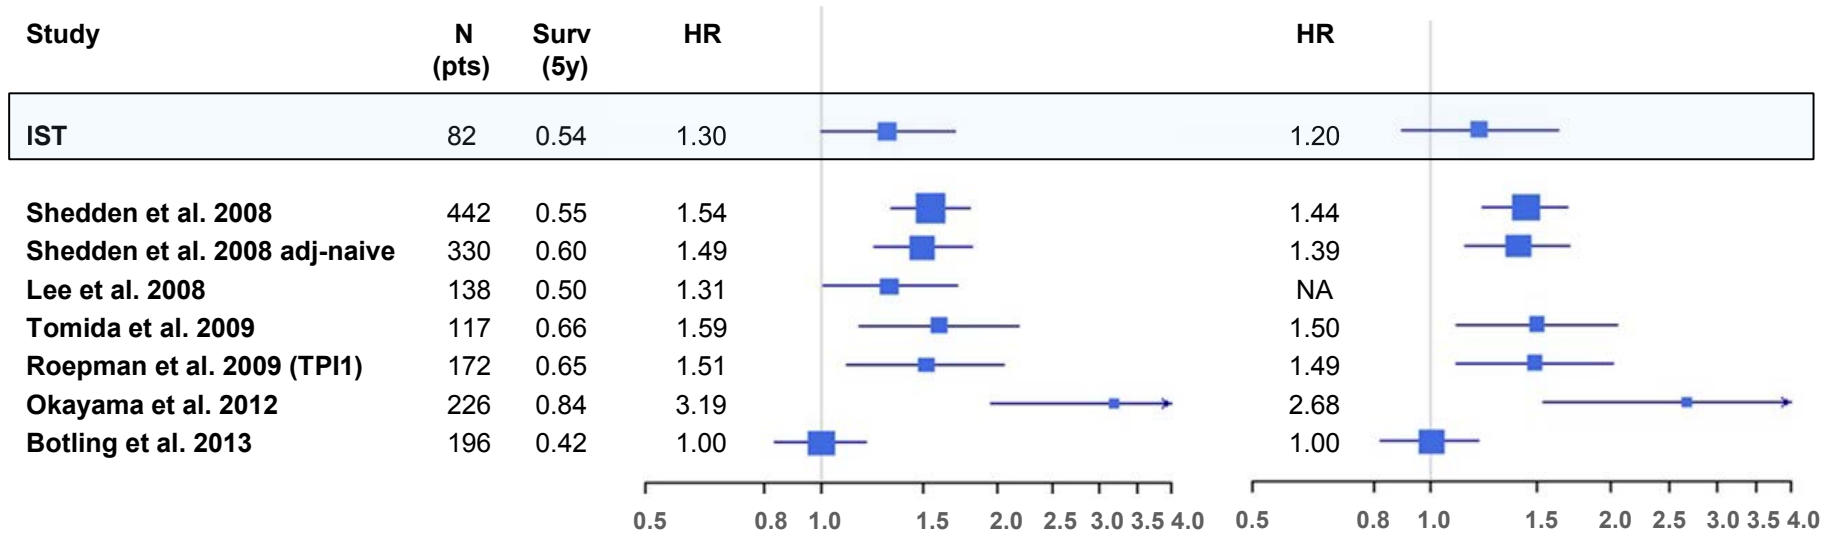

**A) *GAPDH* HR**

**B) *GAPDH* HR adjusted for tumor stage**



Supplement: MOESM3 [file 9552644]
